# Supplementary material for: The Impact of Noise Anxiety on Behavior and Welfare of Horses from UK and US Owner’s Perspective
Source: MDPI journal article supplement (doi:10.3390/ani12101319), 2022-05-21
Supplement: s1 [file s1]

**Table S1.** Survey questions.

| Part | Question                                                                                                                                                                                                                                                                                                             | Possible answer                                                                                            |
|------|----------------------------------------------------------------------------------------------------------------------------------------------------------------------------------------------------------------------------------------------------------------------------------------------------------------------|------------------------------------------------------------------------------------------------------------|
| 1    | Do you own a horse?                                                                                                                                                                                                                                                                                                  | No/Yes, 1 horse/Yes, 2 horses/ Yes, 3 or more horses                                                       |
| 1    | What is your experience with horses?                                                                                                                                                                                                                                                                                 | <2 years/2 – 5 years/6 – 20 years/>20 years                                                                |
| 1    | Has your horse ever shown any unusual behaviour (e.g. restlessness, sweating, decreased appetite) during noisy events such as firework displays?                                                                                                                                                                     | Yes/No <sup>1</sup>                                                                                        |
| 2    | Age of the horse                                                                                                                                                                                                                                                                                                     | <1 year old/1 - 5 years old/6 - 15 years old/>15 years old                                                 |
| 2    | Sex of the horse                                                                                                                                                                                                                                                                                                     | Mare/Stallion/Gelding                                                                                      |
| 2    | Breed of the horse                                                                                                                                                                                                                                                                                                   | Coldblood/Hotblood/Warmblood                                                                               |
| 2    | Main purpose of your horse                                                                                                                                                                                                                                                                                           | Leisure/Riding<br>/Breeding/Driving/Western/Retired                                                        |
| 2    | Define the location of the stable                                                                                                                                                                                                                                                                                    | Rural (surrounded by farms)/Semi-rural (adjacent to an urban area)/Urban (within a town/urban environment) |
| 2    | Which of the following behaviors has your horse shown during noisy events?<br>-Fence/box walking<br>-Running<br>-Decreased appetite<br>-Diarrhea/constipation/colic<br>-Breaking through fences<br>-Weaving or other stereotypic behaviour<br>-Bucking/rearing<br>-Sweating<br>-Fever<br>-Trembling<br>-Vocalization | Always/Sometimes/Never/Don't know                                                                          |
| 2    | How long does anxious behavior usually last?                                                                                                                                                                                                                                                                         | Duration noise event/Up to 2 hours after/Until the next day/I don't know                                   |
| 2    | Has the horse injured itself as a result of the reactions caused by the noisy event?                                                                                                                                                                                                                                 | Yes/No                                                                                                     |
| 2    | How anxious would you rate your horse during noisy events?                                                                                                                                                                                                                                                           | Not anxious/Somewhat anxious/Very anxious-terrified                                                        |
| 2    | Does somebody go and check on the horses during noisy events such as firework displays?                                                                                                                                                                                                                              | Yes/No                                                                                                     |
| 2    | In your opinion, which are your horse's three most alarming behaviors related to noise reactivity?<br>-Fence/box walking<br>-Breaking through fences<br>-Bucking/rearing<br>-Decreased appetite<br>-Diarrhea/constipation/colic<br>-Fence/stall walking<br>-Fever<br>-Running<br>-Sweating                           | Yes/No                                                                                                     |

|   |                                                                                                                                                                                                    |                                                               |
|---|----------------------------------------------------------------------------------------------------------------------------------------------------------------------------------------------------|---------------------------------------------------------------|
|   | -Trembling                                                                                                                                                                                         |                                                               |
|   | -Vocalization                                                                                                                                                                                      |                                                               |
|   | -Weaving or other stereotypic behaviour                                                                                                                                                            |                                                               |
| 2 | At what age did your horse start showing these signs?                                                                                                                                              | <1 year/1-3 years/4-9 years/≥10 years/I don't know            |
| 2 | Has your horse's noise reactivity changed over time?                                                                                                                                               | Better/It's the same/Worse                                    |
| 2 | How often does your horse show signs of noise reactivity?                                                                                                                                          | Once a week/Once a month/Less frequently/Never                |
| 2 | Please indicate if you have tried the following management strategies for your horse during noisy events such as firework displays in previous years and how effective the management strategy was |                                                               |
|   | -Move the horse to a paddock away from the event                                                                                                                                                   |                                                               |
|   | -Turn in / turn out the horse                                                                                                                                                                      |                                                               |
|   | -Move the horse off the property                                                                                                                                                                   | Very effective/Somewhat effective/Not effective/Haven't tried |
|   | -Sedate the horse (prescription medicines)                                                                                                                                                         |                                                               |
|   | -Use over-the-counter products (pheromones, herbal calmers, etc.)                                                                                                                                  |                                                               |
|   | -Use ear plugs/cover for the horse                                                                                                                                                                 |                                                               |
|   | -Cover windows                                                                                                                                                                                     |                                                               |
|   | -Play music/radio in the barn                                                                                                                                                                      |                                                               |
|   | -Provide hay through out the night                                                                                                                                                                 |                                                               |
| 2 | If there was a new oral prescription product for noise reactivity available, would you be interested in using it?                                                                                  | No/Likely no/Likely yes/Yes                                   |

<sup>1</sup> Only respondents answering "Yes" could access to the Part 2 of the questionnaire.

**Table S2.** Owners and Horse populations main characteristics.

|                                                                                | UK owners<br>(N=1220)  | US owners<br>(N=616) |
|--------------------------------------------------------------------------------|------------------------|----------------------|
| How many horses they own                                                       |                        |                      |
| None                                                                           | 34 (2.8%)              | 17 (2.8%)            |
| 1 horse                                                                        | 678 (55.6%)            | 250 (41.3%)          |
| 2 horses                                                                       | 294 (24.1%)            | 149 (24.6%)          |
| 3 or more horses                                                               | 214 (17.5%)            | 189 (31.2%)          |
| How many years of experience with horses they have                             |                        |                      |
| < 2 years                                                                      | 62 (5.1%) <sup>9</sup> | 47 (7.8%)            |
| 2-5 years                                                                      | 128 (10.5%)            | 108 (17.9%)          |
| 6-20 years                                                                     | 476 (39.0%)            | 278 (46.0%)          |
| > 20 years                                                                     | 554 (45.4%)            | 172 (28.4%)          |
| How many horses has ever shown any unusual behavior in relation to loud noises |                        |                      |
| Yes                                                                            | 275 (22.4%)            | 134 (22.0%)          |
| No                                                                             | 952 (77.6%)            | 474 (78.0%)          |
| Horses' age                                                                    |                        |                      |
| < 1 year old                                                                   | 1 (0.4%)               | 0 (0%)               |
| 1-5 years old                                                                  | 25 (9.2%)              | 13 (9.7%)            |

|                      |             |            |
|----------------------|-------------|------------|
| 6-15 years old       | 166 (60.8%) | 76 (56.7%) |
| > 15 years old       | 81 (29.7%)  | 45 (33.6%) |
| Horses' sex          |             |            |
| Mare                 | 107 (39.2%) | 57 (42.5%) |
| Stallion             | 1 (0.4%)    | 0 (0%)     |
| Gelding              | 165 (60.4%) | 77 (57.5%) |
| Horses' main purpose |             |            |
| Riding               | 174 (64.0%) | 39 (29.6%) |
| Endurance            | 4 (1.5%)    | 2 (1.5%)   |
| Western              | 4 (1.5%)    | 20 (15.2%) |
| Trekking             | 27 (9.9%)   | 38 (28.8%) |
| Harness racing       | 0 (0%)      | 0 (0%)     |
| Breeding             | 2 (0.7%)    | 1 (0.8%)   |
| Other                | 61 (22.4%)  | 32 (24.2%) |
